# Supplementary material
Source: publisher figshare collection journal article supplement (https://gsapubs.figshare.com/ndownloader/files/24723866)
Supplement: Supplementary file 1 [file 24723866]

## Sheet: Sheet1
TABLE S4. AMPHIBOLE RADIOGENIC-ISOTOPE DATA COLLECTED AT USC
	143Nd/ 144Nd	2s error	eNd	176Hf/177Hf	2s error	eHf	87Sr/86Sr	2s error
1438E-68R2 38-40 (hornblende separate)	0.513034	4e-06	7.87217	0.283165	3e-06	13.4368	0.703086	4.85527e-06
